# Supplementary material for: The Clinical Application of Immunohistochemical Expression of Notch4 Protein in Patients with Colon Adenocarcinoma
Source: MDPI journal article supplement (doi:10.3390/ijms24087502), 2023-04-19
Supplement: s1 [file s1]

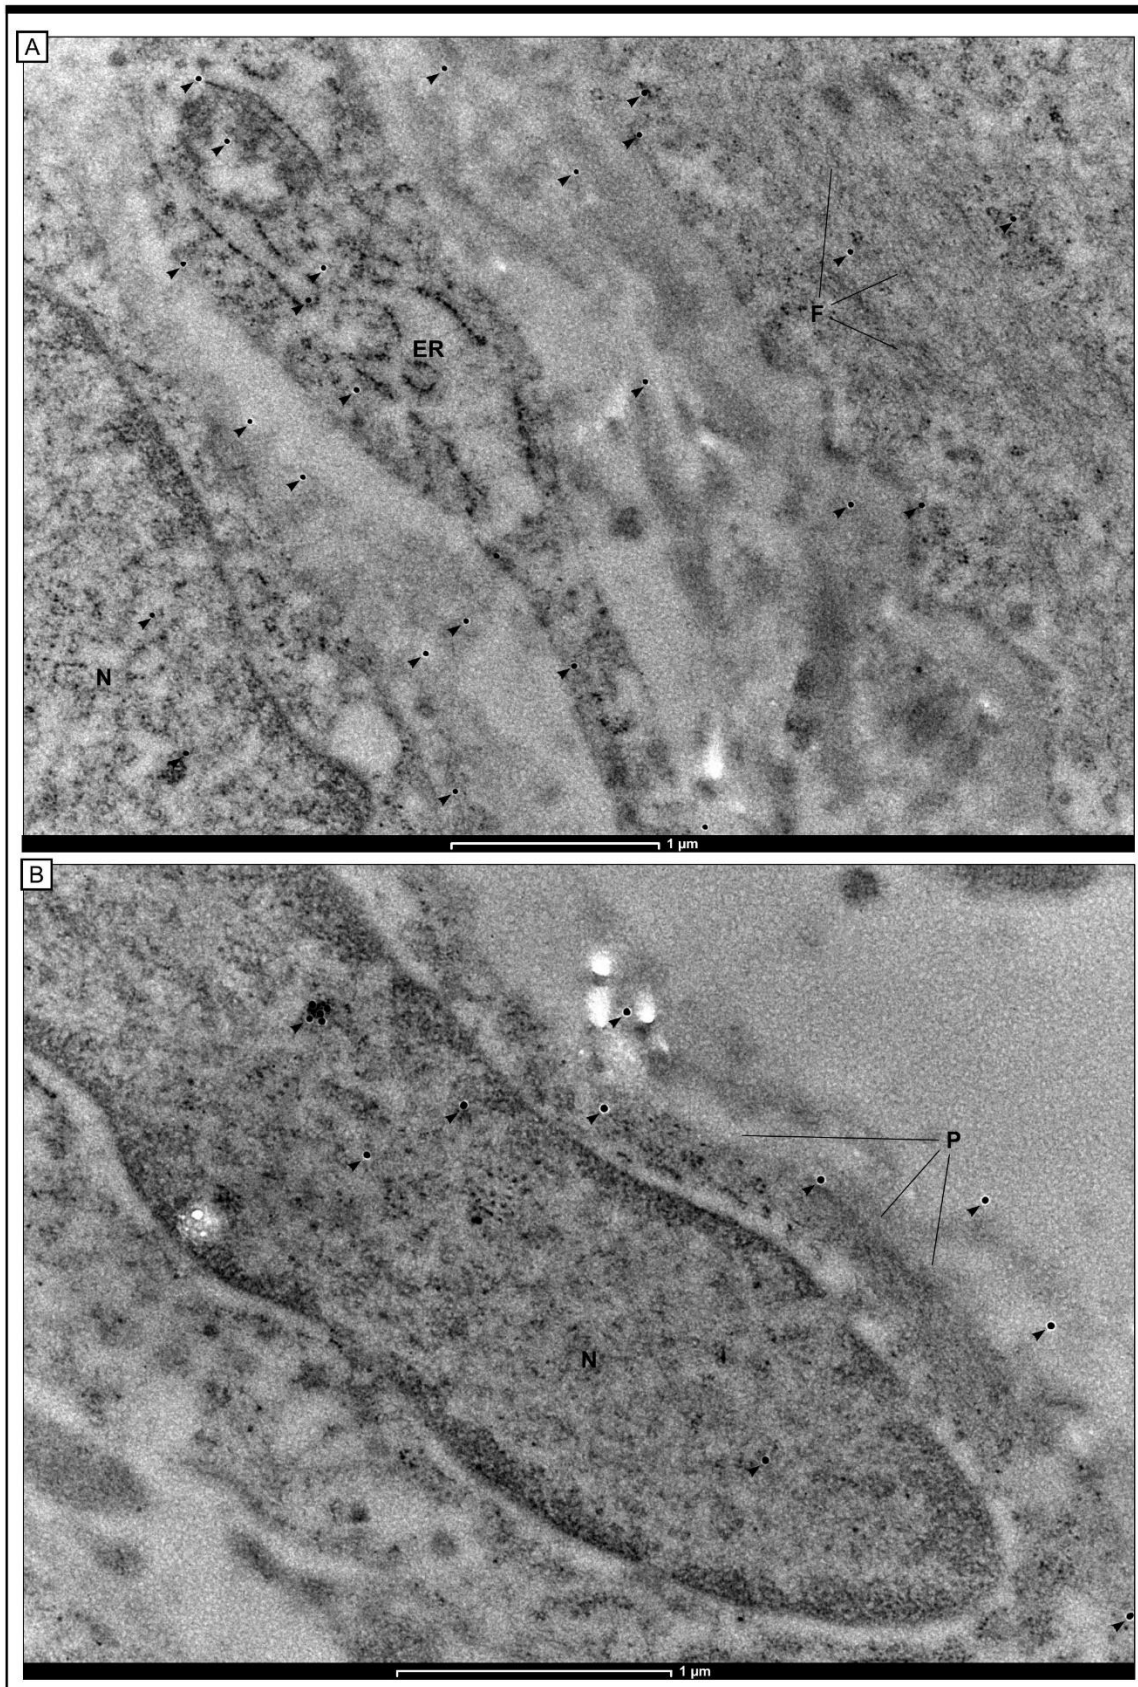

Figure S1: In the fibroblasts of non-pathological colon tissue, the electron-dense black granules indicating the presence of Notch 4 expression (arrowheads) were found in the cell membrane (P), in the nucleus (N) and the endoplasmic reticulum (ER). F- cytoplasmic intermediate filaments. The scale bar is 1 µm (A, B).
